# Supplementary material for: Decreased Vitamin D Levels and Altered Placental Vitamin D Gene Expression at High Altitude: Role of Genetic Ancestry
Source: MDPI journal article supplement (doi:10.3390/ijms24043389), 2023-02-08
Supplement: s1 [file s1]

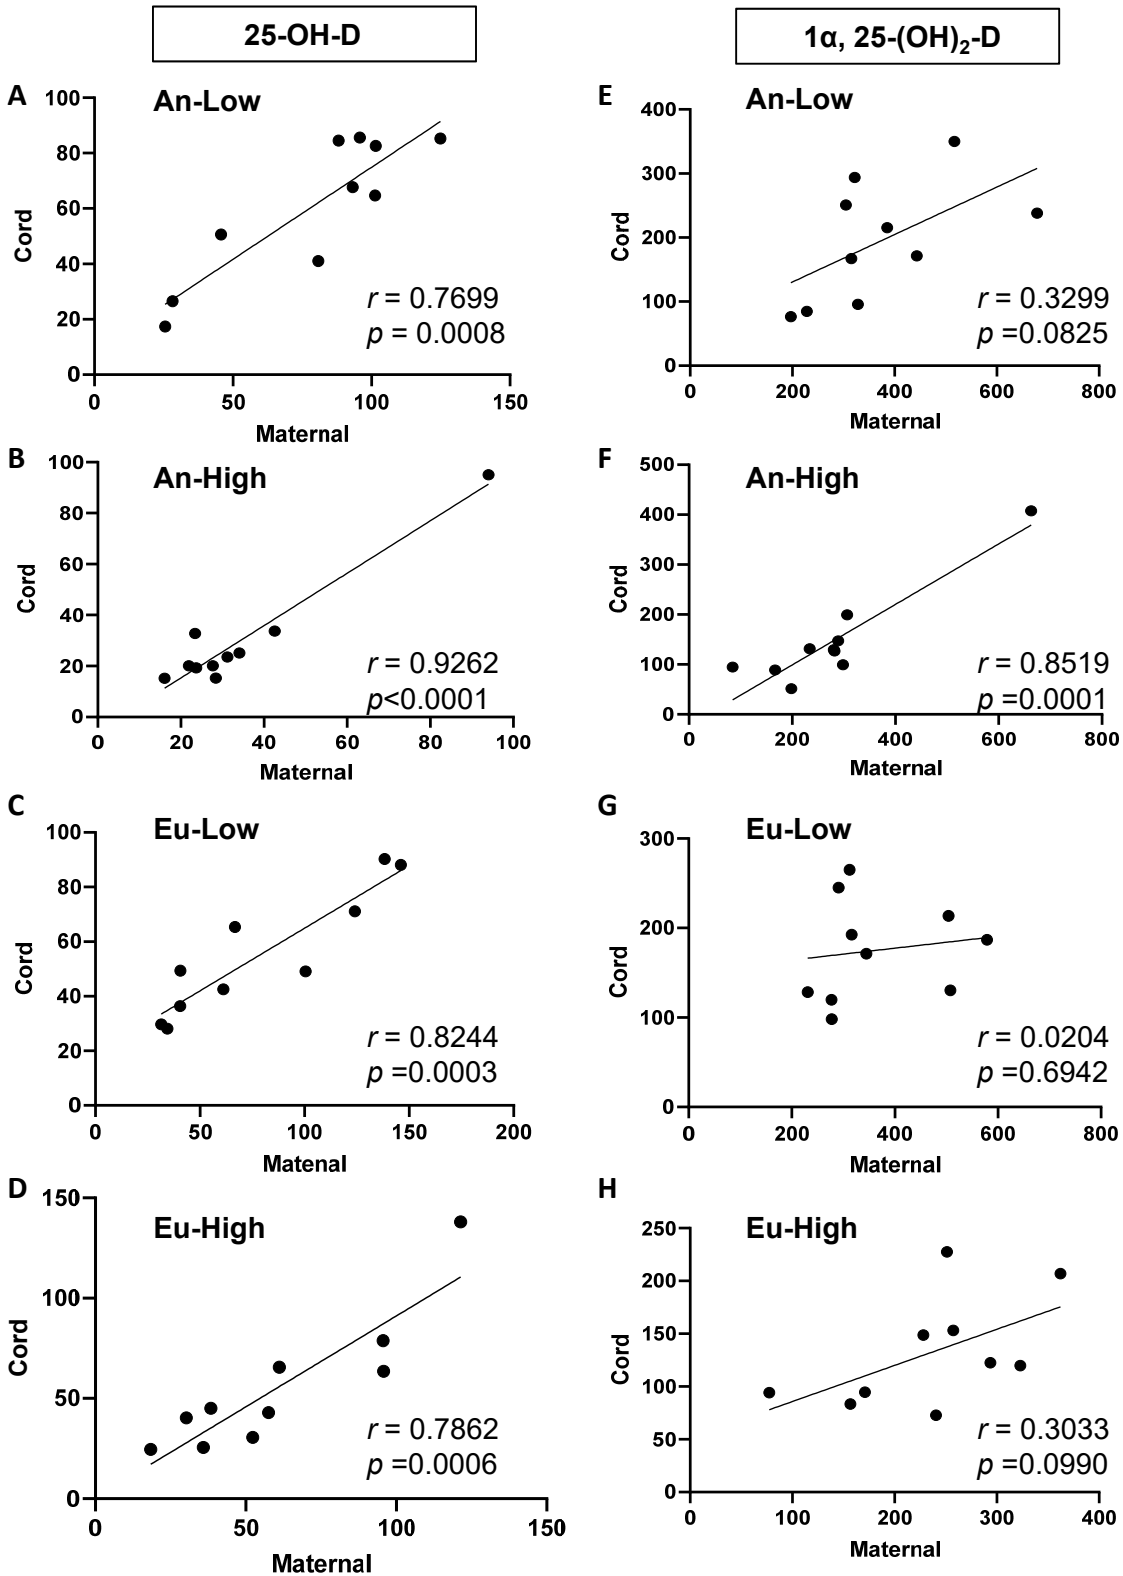

**Supplementary Figure S1.** Correlations between maternal and umbilical cord blood levels of vitamin D metabolites. A-D) linear regression analysis between maternal and fetal/neonatal levels of 25-OH-D (nanomoles/L) in An-Low (A), An-High (B), Eu-Low (C), and Eu-High (D). E-G) linear regression analysis of 1α,25-(OH)<sub>2</sub>-D (picomoles/L) levels correlation between maternal and fetal/neonatal samples in An-Low (E), An-High (F), Eu-Low (G), and Eu-High (H). Insets show the correlation coefficient and *p* value.

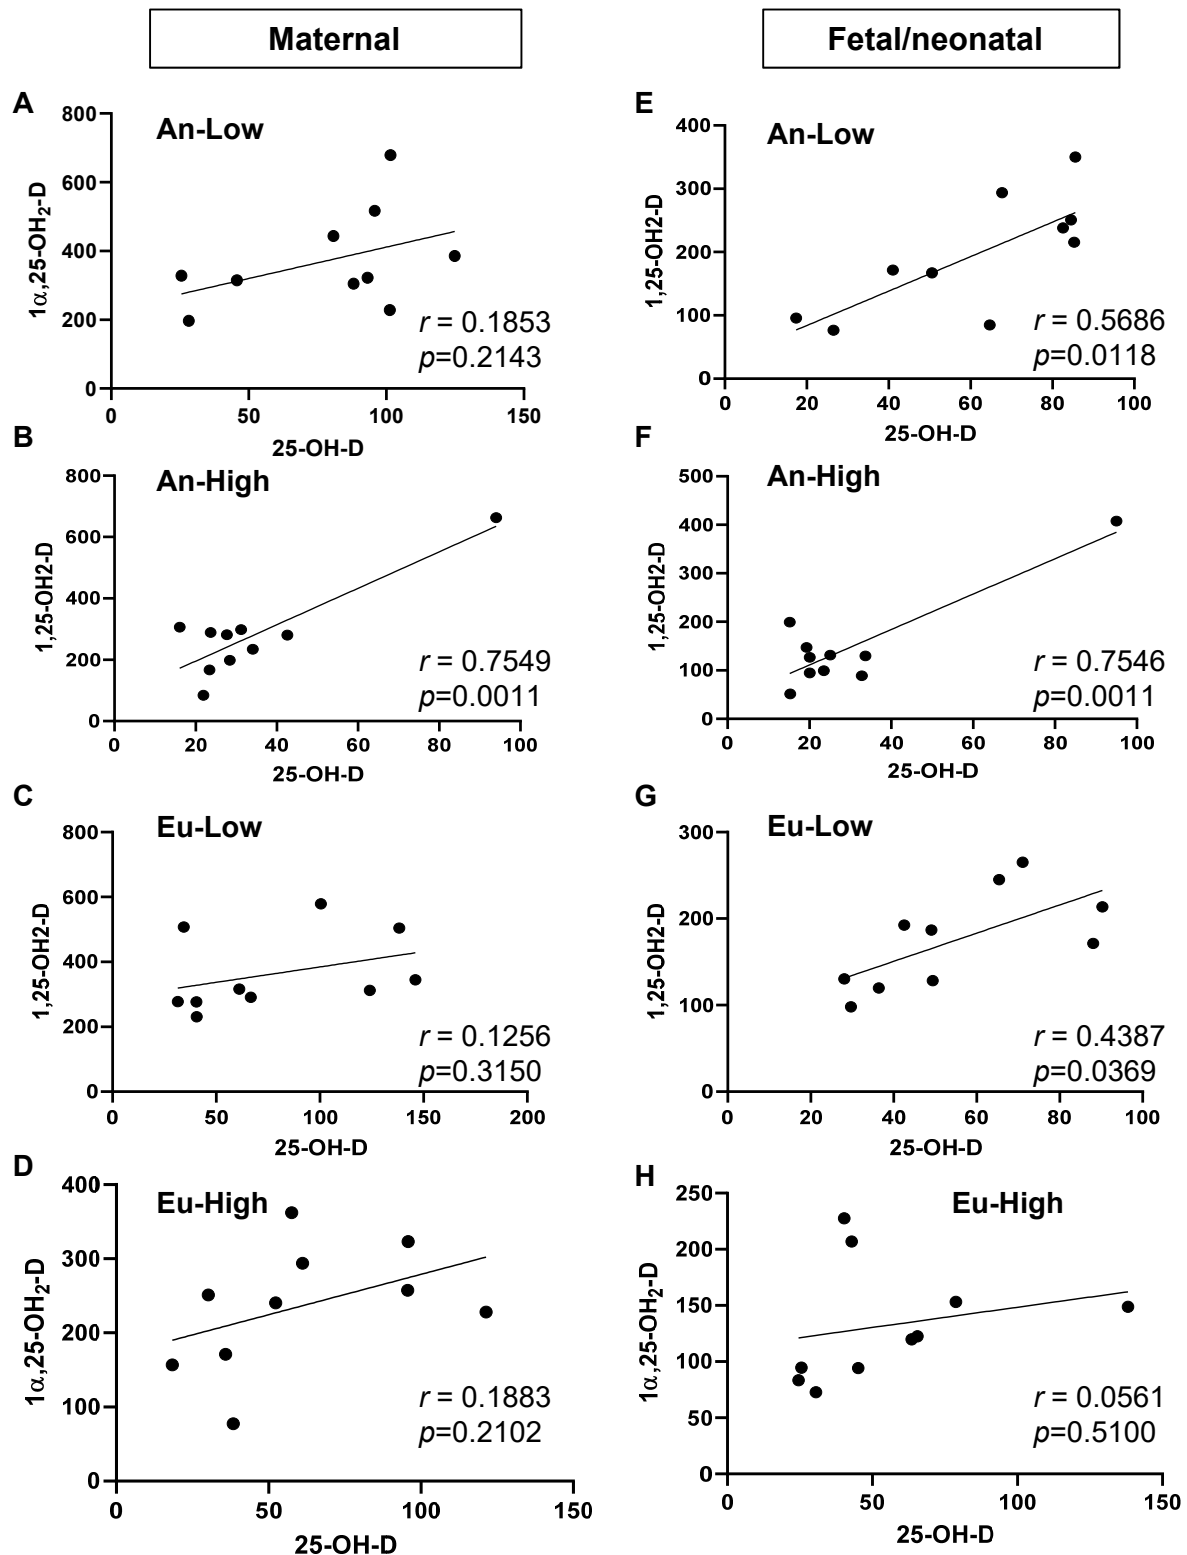

**Supplementary Figure S2.** Correlations between 25-OH-D and  $1\alpha,25\text{-(OH)}_2\text{-D}$ . Linear regression analysis of the precursor 25-OH-D (nanomoles/L) and the bioactive form  $1\alpha,25\text{-(OH)}_2\text{-D}$  (picomoles/L) is shown for maternal blood of An-Low (A), An-High (B), Eu-Low (C), Eu-High (D) as well as for umbilical cord blood (fetal/neonatal) samples of An-Low (E), An-High (F), Eu-Low (G) and Eu-High (H) groups. Insets show the correlation coefficient and  $p$  value.
